# Supplementary material
Source: publisher site journal article supplement (https://static.cambridge.org/content/id/urn:cambridge.org:id:article:S1041610218001436/resource/name/S1041610218001436supp001.docx)
Supplement: Supplementary file 1 [file S1041610218001436supp001.docx]

# Appendix A1.

# Complete Search Terminology Used in the Systematic Literature Search and Adaptations for Each Source

**Full Search Terminology**(a) Dement* OR Alzheimer* OR “Lewy bod*” OR “fronto*temporal” OR “LBD” OR “DLB” OR “FTD” OR “progressive cognitive impairment” OR “progressive cognitive decline” OR “progressive cognitive illness” OR neurodegenerative
**AND**(b) Carer* OR caregiver* OR care OR caring OR famil* OR spouse* OR partner* OR relative*
**AND**(c) "Cognitive behavio*ral therapy" OR CBT OR "cognitive therapy" OR “acceptance and commitment therapy” OR “ACT” OR “dialectical behavio*r therapy” OR “DBT” OR “metacognitive therapy” OR “mindfulness*based cognitive therapy” OR “MBCT” OR “behavio*ral activation” OR “behavio*ral therapy” OR “exposure therapy” OR “systematic desensiti*ation”
**AND**(d) Trial OR trials OR randomi*ed OR RCT OR “pre and post” OR effectiveness OR effect OR
efficacy OR quantitative OR outcome OR outcomes OR comparison

**Adaptations for each source:**

| **Source** | **Terms** | **Limits** |
| --- | --- | --- |
| PsycINFO | As above | English Language; Adulthood 18+; Clinical Trial; Empirical Study; Field Study; Quantitative study; Treatment Outcome |
| MEDLINE | As above | English Language; All Adult; Human; Clinical Trial; Comparative Study; Controlled Clinical Trial; Journal Article; |
| CINAHL | As above | English Language; All Adult; Clinical Trial; Doctoral Dissertation; Journal Article; Masters Thesis; Nursing Interventions; Randomized Controlled Trial; Research |
| Scopus | As above | Article; Article in Press; Article or Conference Paper |
| Open Grey | As above | None |
| ProQuest | As above | None |
| ISRCTN registry | As above | None |
| ClinicalTrials.gov | (a) AND (b) AND (Therapy OR CBT OR ACT OR MBCT OR DBT OR “behavio*arl activation” OR “systematic desensiti*ation”) | Adult; Senior |
